# Supplementary material for: An observational study on risk of secondary cancers in chronic myeloid leukemia patients in the TKI era in the United States
Source: PeerJ. 2018 Feb 12;6:e4342. doi: 10.7717/peerj.4342 (PMC5813591; doi:10.7717/peerj.4342)
Supplement: Supplemental Information 1 [file peerj-06-4342-s001.xlsx]

## Sheet: Sheet1
Cancer sites	2-11 months	2-11 months2	2-11 months3	2-11 months4	2-11 months5	12-59 months	12-59 months6	12-59 months7	12-59 months8	12-59 months9	60-119 months	60-119 months10	60-119 months11	60-119 months12	60-119 months13	120+ months	120+ months14	120+ months15	120+ months16	120+ months17
	Observed	O/E	CI Lower	CI Upper	Excess Risk	Observed	O/E	CI Lower	CI Upper	Excess Risk	Observed	O/E	CI Lower	CI Upper	Excess Risk	Observed	O/E	CI Lower	CI Upper	Excess Risk
All Sites excluding Non-Melanoma Skin	106	1.5	1.1	1.8	44.05	279	1.3	1.2	1.4	33.74	111	1.1	0.9	1.35	9.97	15	1.2	0.7	2.1	24.96
All Solid Tumors	83	1.27#	1.01	1.57	25.46	241	1.28#	1.13	1.46	25.75	98	1.08	0.88	1.32	7.79	11	1	0.5	1.79	0.2
Oral Cavity and Pharynx	1	0.54	0.01	3.02	-1.23	6	1.1	0.41	2.4	0.27	6	2.19	0.8	4.77	3.33	0	0	0	10.99	-3.02
Gum and Other Mouth	1	4	0.1	22.3	1.09	1	1.4	0.04	7.79	0.14	3	8.52#	1.76	24.91	2.7	0	0	0	86.22	-0.38
Digestive System	18	1.27	0.75	2.01	5.61	48	1.19	0.88	1.58	3.79	23	1.19	0.75	1.78	3.68	5	2.12	0.69	4.95	23.75
Stomach	2	1.59	0.19	5.75	1.08	5	1.41	0.46	3.3	0.71	7	4.10#	1.65	8.46	5.4	0	0	0	17.68	-1.87
Small Intestine	2	5.77	0.7	20.85	2.4	2	1.94	0.24	7.02	0.47	1	1.91	0.05	10.66	0.49	1	15.35	0.39	85.53	8.4
colon	11	2.09#	1.05	3.75	8.34	23	1.58#	1	2.38	4.11	6	0.9	0.33	1.95	-0.72	2	2.52	0.3	9.09	10.83
Rectum	1	0.67	0.02	3.71	-0.73	3	0.7	0.14	2.04	-0.63	1	0.48	0.01	2.7	-1.08	0	0	0	14.85	-2.23
Hepatobiliary	1	0.55	0.01	3.05	-1.2	7	1.29	0.52	2.65	0.76	4	1.42	0.39	3.63	1.2	0	0	0	10.37	-3.2
Liver	0	0	0	3.07	-1.75	6	1.65	0.61	3.6	1.15	3	1.58	0.33	4.61	1.12	0	0	0	15.35	-2.16
Pancreas	1	0.48	0.01	2.67	-1.58	8	1.32	0.57	2.61	0.95	1	0.33	0.01	1.85	-2.05	1	2.69	0.07	14.99	5.65
Respiratory System	17	1.49	0.87	2.39	8.13	43	1.34	0.97	1.81	5.31	18	1.19	0.7	1.88	2.9	1	0.54	0.01	2.99	-7.74
Lung and Bronchus	17	1.6	0.93	2.56	9.25	42	1.41#	1.01	1.9	5.89	17	1.2	0.7	1.93	2.94	1	0.58	0.01	3.21	-6.6
Soft Tissue including Heart	0	0	0	8.42	-0.64	3	2.34	0.48	6.84	0.83	3	4.74	0.98	13.87	2.41	0	0	0	48.49	-0.68
Skin excluding Basal and Squamous	8	2.15	0.93	4.23	6.2	11	1	0.5	1.79	0.01	13	2.35#	1.25	4.01	7.61	2	2.98	0.36	10.76	11.93
Melanoma of the Skin	7	2.06	0.83	4.25	5.24	9	0.9	0.41	1.7	-0.5	12	2.37#	1.22	4.13	7.06	1	1.63	0.04	9.06	3.46
Female Breast	4	0.52	0.14	1.33	-5.33	15	0.64	0.36	1.05	-4.13	6	0.51	0.19	1.11	-5.91	2	1.41	0.17	5.08	5.2
Female Genital System	2	0.67	0.08	2.44	-1.4	17	1.86#	1.08	2.98	3.82	5	1.09	0.35	2.54	0.42	0	0	0	6.65	-4.99
Cervix Uteri	1	2.92	0.07	16.3	0.96	4	3.85#	1.05	9.86	1.44	0	0	0	7.52	-0.5	0	0	0	67.29	-0.49
Corpus and Uterus, NOS	0	0	0	2.33	-2.3	7	1.41	0.57	2.91	0.99	2	0.79	0.1	2.84	-0.56	0	0	0	11.72	-2.83
Ovary	1	1.3	0.03	7.26	0.34	3	1.3	0.27	3.81	0.34	2	1.79	0.22	6.48	0.9	0	0	0	27.93	-1.19
Male Genital System	15	1.06	0.59	1.75	1.21	63	1.62#	1.24	2.07	11.65	11	0.62	0.31	1.12	-6.74	2	0.94	0.11	3.4	-1.14
Prostate	15	1.08	0.61	1.79	1.66	62	1.63#	1.25	2.09	11.6	11	0.64	0.32	1.14	-6.32	2	0.96	0.12	3.47	-0.74
Urinary System	10	1.48	0.71	2.72	4.69	26	1.35	0.88	1.98	3.3	11	1.18	0.59	2.11	1.72	0	0	0	3.23	-10.26
Urinary Bladder	8	1.96	0.84	3.85	5.67	18	1.59	0.94	2.52	3.25	3	0.56	0.11	1.63	-2.43	0	0	0	5.6	-5.92
Kidney	2	0.85	0.1	3.08	-0.5	6	0.86	0.32	1.87	-0.47	8	2.3	0.99	4.53	4.61	0	0	0	8.62	-3.85
Endocrine System	7	5.43#	2.18	11.18	8.29	9	2.19#	1	4.16	2.37	3	1.4	0.29	4.1	0.88	0	0	0	14.35	-2.31
Thyroid	4	3.3	0.9	8.46	4.05	9	2.33#	1.06	4.41	2.49	3	1.48	0.31	4.33	0.99	0	0	0	15.15	-2.19
All Hematological and lymphatic except Acute leukemia	19	2.9#	1.2	4	18.59	34	1.82	0.5	5	7.88	9	1.1	0.2	4	1.15	4	3.57#	1.1	10	24.5
Non-Hodgkin Lymphoma	5	1.6	0.52	3.74	2.73	13	1.45	0.77	2.47	1.94	1	0.23	0.01	1.26	-3.47	3	5.61#	1.16	16.4	22.15
Myeloma	2	1.83	0.22	6.63	1.32	4	1.26	0.34	3.23	0.4	4	2.53	0.69	6.47	2.46	0	0	0	18.5	-1.79
Chronic Lymphocytic Leukemia	5	5.76#	1.87	13.43	6	8	3.24#	1.4	6.38	2.68	2	1.65	0.2	5.97	0.8	1	6.72	0.17	37.43	7.65
# significant at p<0.05
Excess risk is per 10,000
